# Supplementary material for: A Minimal Physiologically‐Based Pharmacokinetic Model for Tacrolimus in Living‐Donor Liver Transplantation: Perspectives Related to Liver Regeneration and the cytochrome P450 3A5 (CYP3A5) Genotype
Source: PubMed Central journal article supplement — CPT Pharmacometrics Syst Pharmacol. 2019 Jun 9;8(8):587–95. doi: 10.1002/psp4.12420 (PMC6709420; doi:10.1002/psp4.12420), 2019-06-09
Supplement: PSP4-8-587-s001.pdf [file PSP4-8-587-s001.pdf]

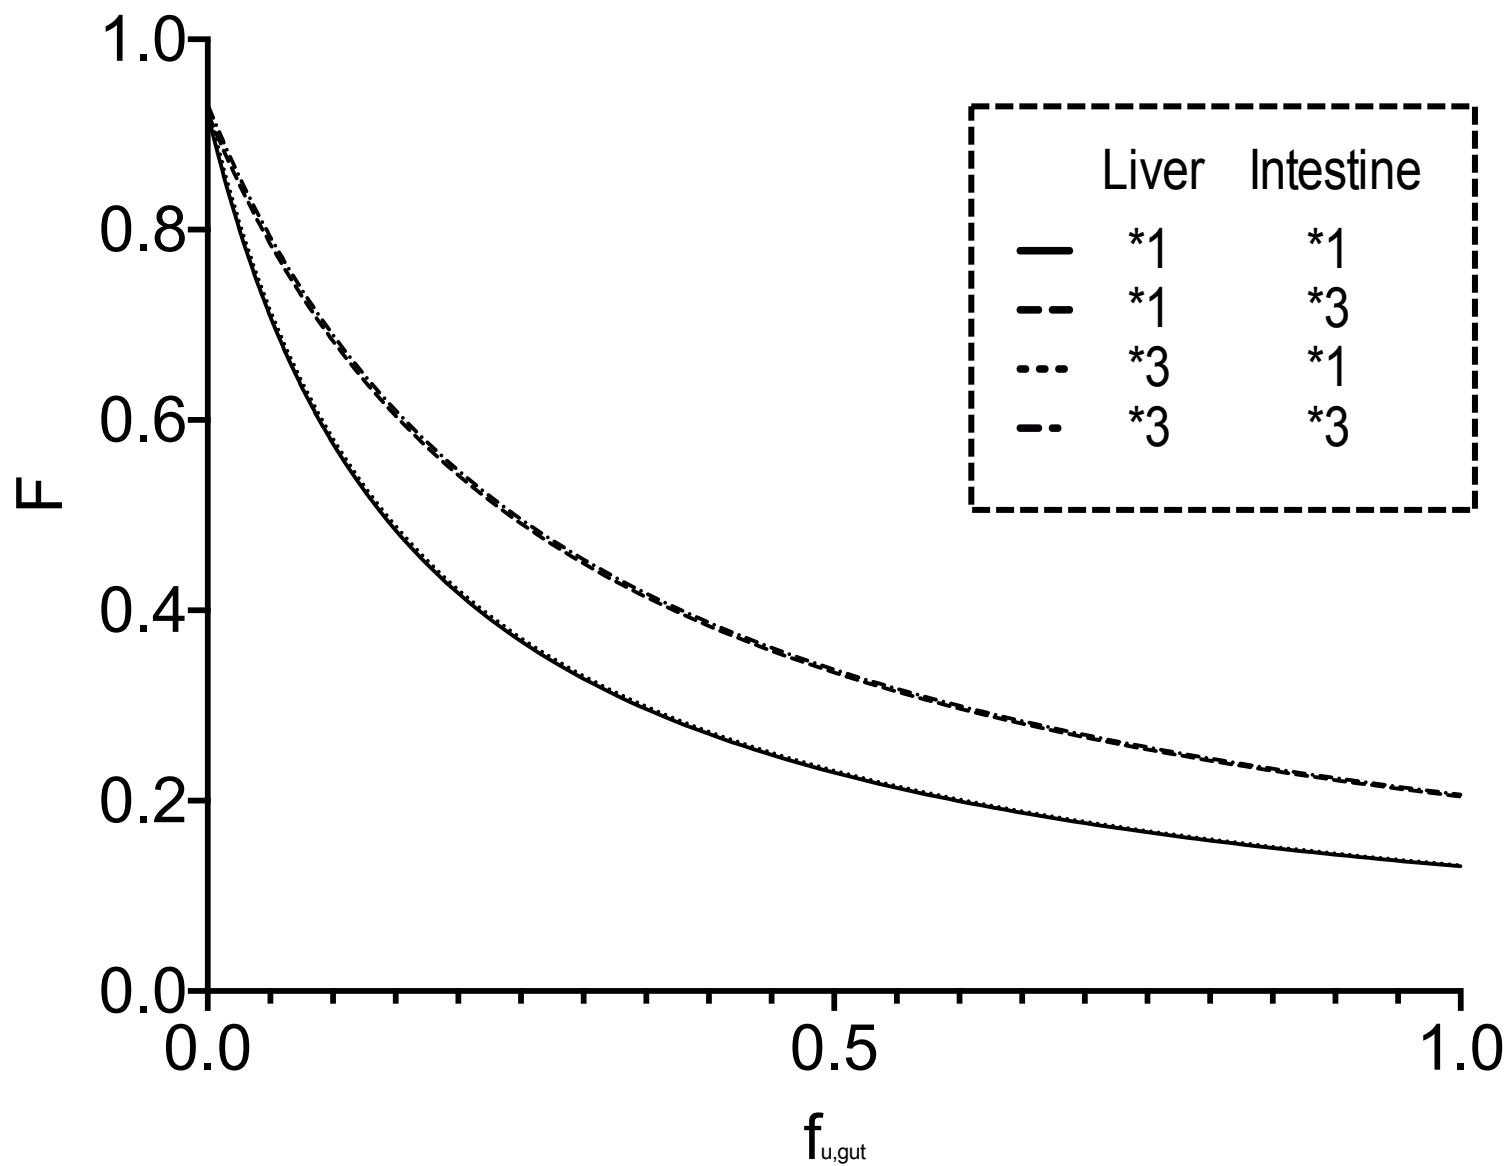

**Figure S1**

Sensitive analysis about the  $f_{u,gut}$  versus oral bioavailability in patients with each *CYP3A5* genotypes.
