# Supplementary material for: A Minimal Physiologically‐Based Pharmacokinetic Model for Tacrolimus in Living‐Donor Liver Transplantation: Perspectives Related to Liver Regeneration and the cytochrome P450 3A5 (CYP3A5) Genotype
Source: PubMed Central journal article supplement — CPT Pharmacometrics Syst Pharmacol. 2019 Jun 9;8(8):587–95. doi: 10.1002/psp4.12420 (PMC6709420; doi:10.1002/psp4.12420), 2019-06-09
Supplement: PSP4-8-587-s002.pdf [file PSP4-8-587-s002.pdf]

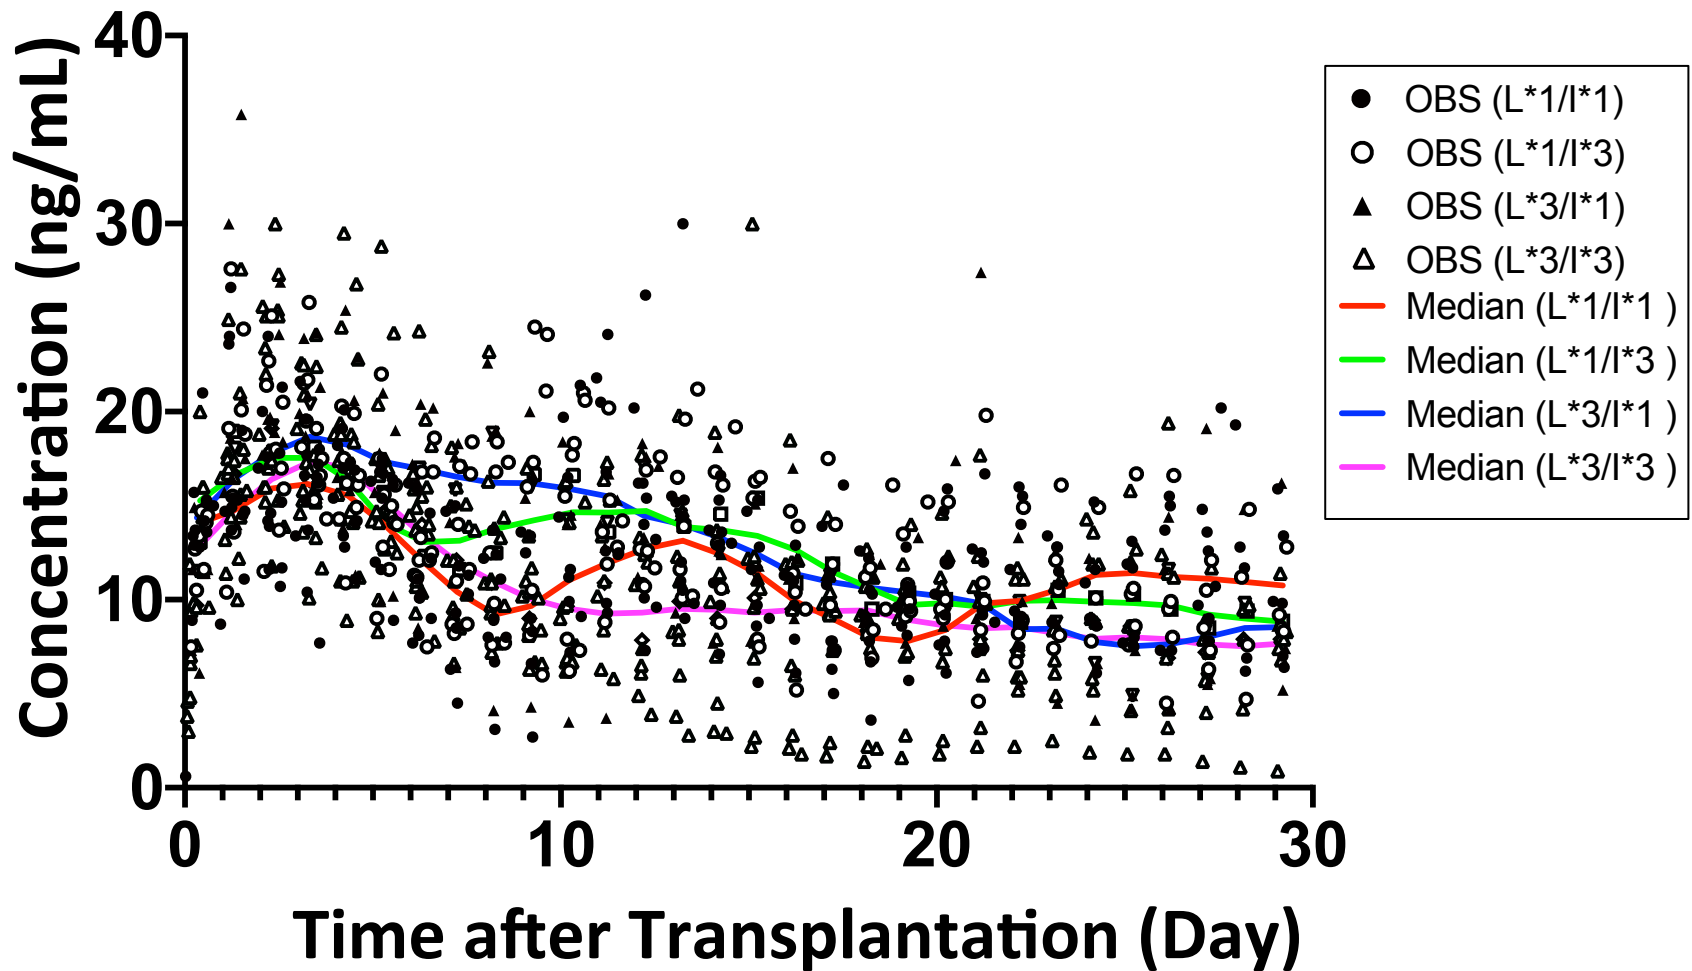

**Figure S2**

Observed blood concentration of tacrolimus after LDLT patients in the model building data. Closed circle, open circle, closed triangle, and open triangle represent the observed blood concentration in patients with *CYP3A5*\*1 allele in both graft liver and small intestine (L\*1/I\*1), *CYP3A5*\*1 allele in graft liver and *CYP3A5*\*3/\*3 in small intestine(L\*1/I\*3), *CYP3A5*\*3/\*3 in graft liver and *CYP3A5*\*1 allele in small intestine(L\*3/I\*1), and *CYP3A5*\*3/\*3 in both graft liver and small intestine(L\*3/I\*3), respectively. Red, green, blue, and purple lines show the median value in patients with L\*1/I\*1, L\*1/I\*3, L\*3/I\*1, and L\*3/I\*3, respectively.
