# Supplementary material for: A Minimal Physiologically‐Based Pharmacokinetic Model for Tacrolimus in Living‐Donor Liver Transplantation: Perspectives Related to Liver Regeneration and the cytochrome P450 3A5 (CYP3A5) Genotype
Source: PubMed Central journal article supplement — CPT Pharmacometrics Syst Pharmacol. 2019 Jun 9;8(8):587–95. doi: 10.1002/psp4.12420 (PMC6709420; doi:10.1002/psp4.12420), 2019-06-09
Supplement: PSP4-8-587-s003.pdf [file PSP4-8-587-s003.pdf]

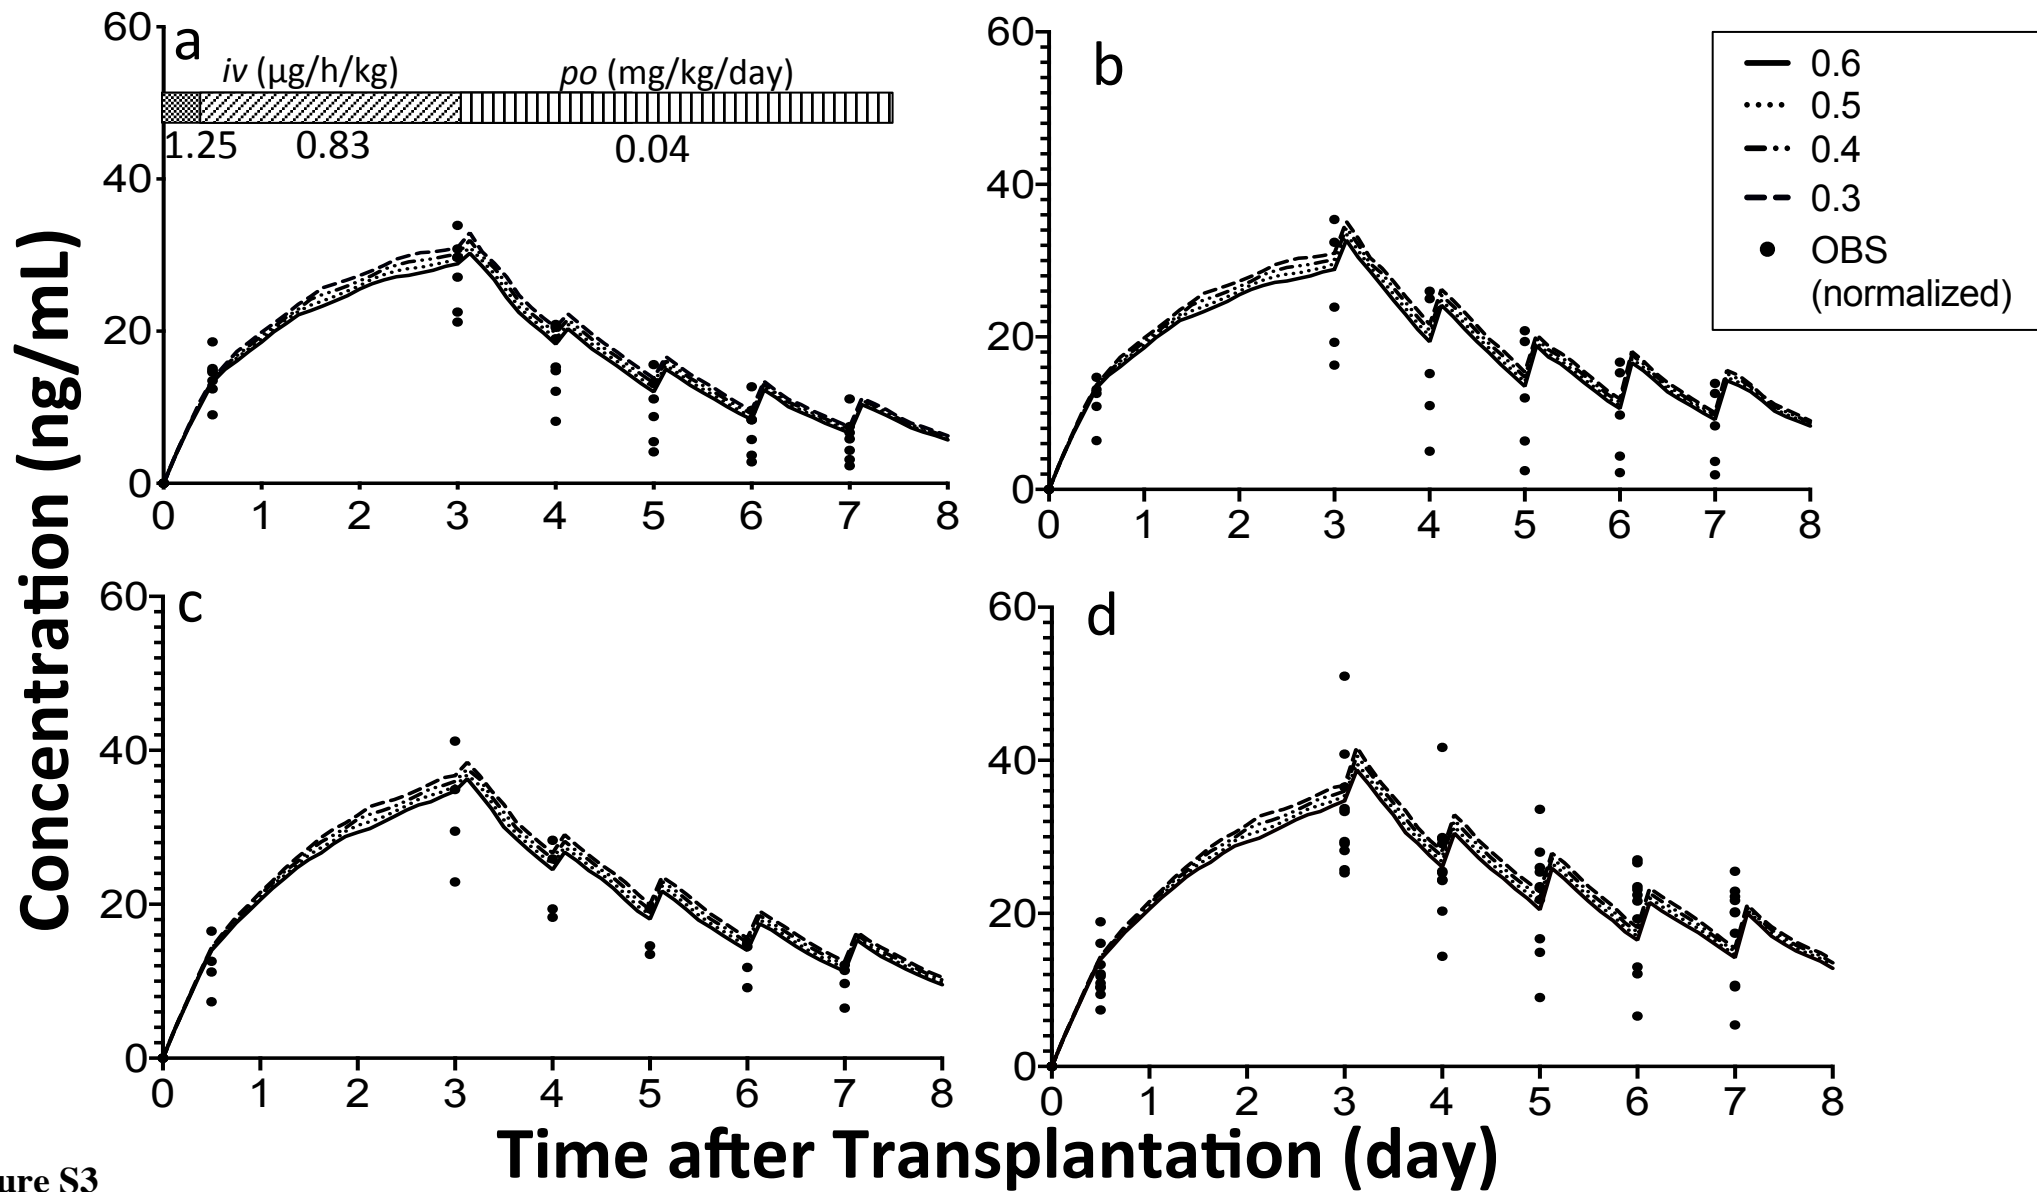

**Figure S3**

Effect of initial size of graft liver on the predicted blood concentration of tacrolimus immediately after LDLT. (a) *CYP3A5\*1* allele in both graft liver and small intestine (L\*1/I\*1), (b) *CYP3A5\*1* allele in graft liver and *CYP3A5\*3/\*3* in small intestine (L\*1/I\*3), (c) *CYP3A5\*3/\*3* in graft liver and *CYP3A5\*1* allele in small intestine (L\*3/I\*1), (d) *CYP3A5\*3/\*3* in both graft liver and small intestine (L\*3/I\*3). Each closed circle shows the observed concentration normalized by the dosing regimen (OBS). The number of patient with L\*1/I\*1, L\*1/I\*3, L\*3/I\*1 and L\*3/I\*3 were 7,5, 4, and 10 respectively.
